# Supplementary material
Source: ML conference proceedings conference paper supplement (https://openaccess.thecvf.com/content/ICCV2025/html/Gao_AnyPortal_Zero-Shot_Consistent_ICCV_2025_paper.html)

### (a) Background Generation

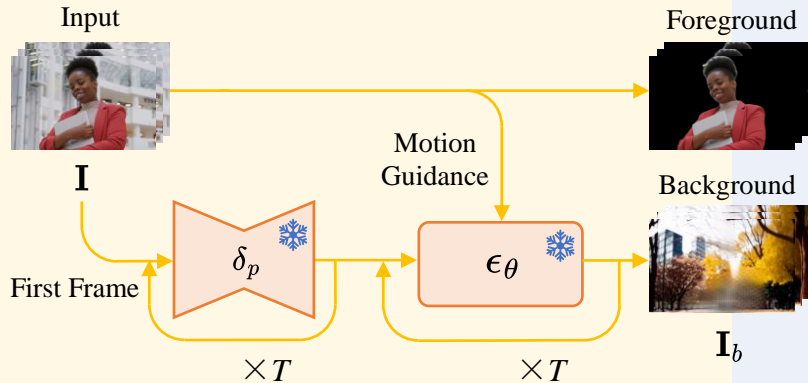

### (b) Light Harmonization

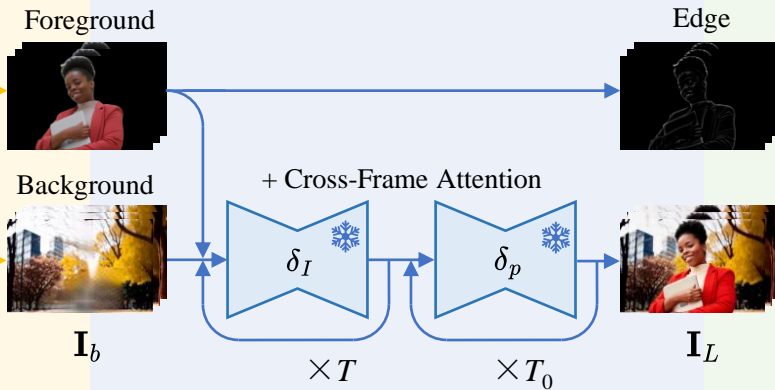

### (c) Consistency Enhancement

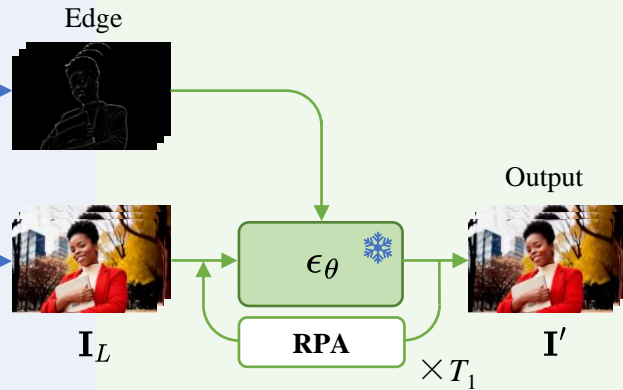

Supplement: Supplementary file 1 [file fig2-pipeline.pdf › ICCV2025_AnyPortal_supp_final/Supplementary_Material/videos/videos/fig2-pipeline.pdf]
